# Supplementary material for: One Year Follow-Up of COVID-19 Related Symptoms and Patient Quality of Life: A Prospective Cohort Study
Source: PubMed Central journal article supplement — Yonsei Med J. 2022 May 19;63(6):499–510. doi: 10.3349/ymj.2022.63.6.499 (PMC9171672; doi:10.3349/ymj.2022.63.6.499), 2022-05-19
Supplement: ymj-63-499-s001.pdf [file ymj-63-499-s001.pdf]

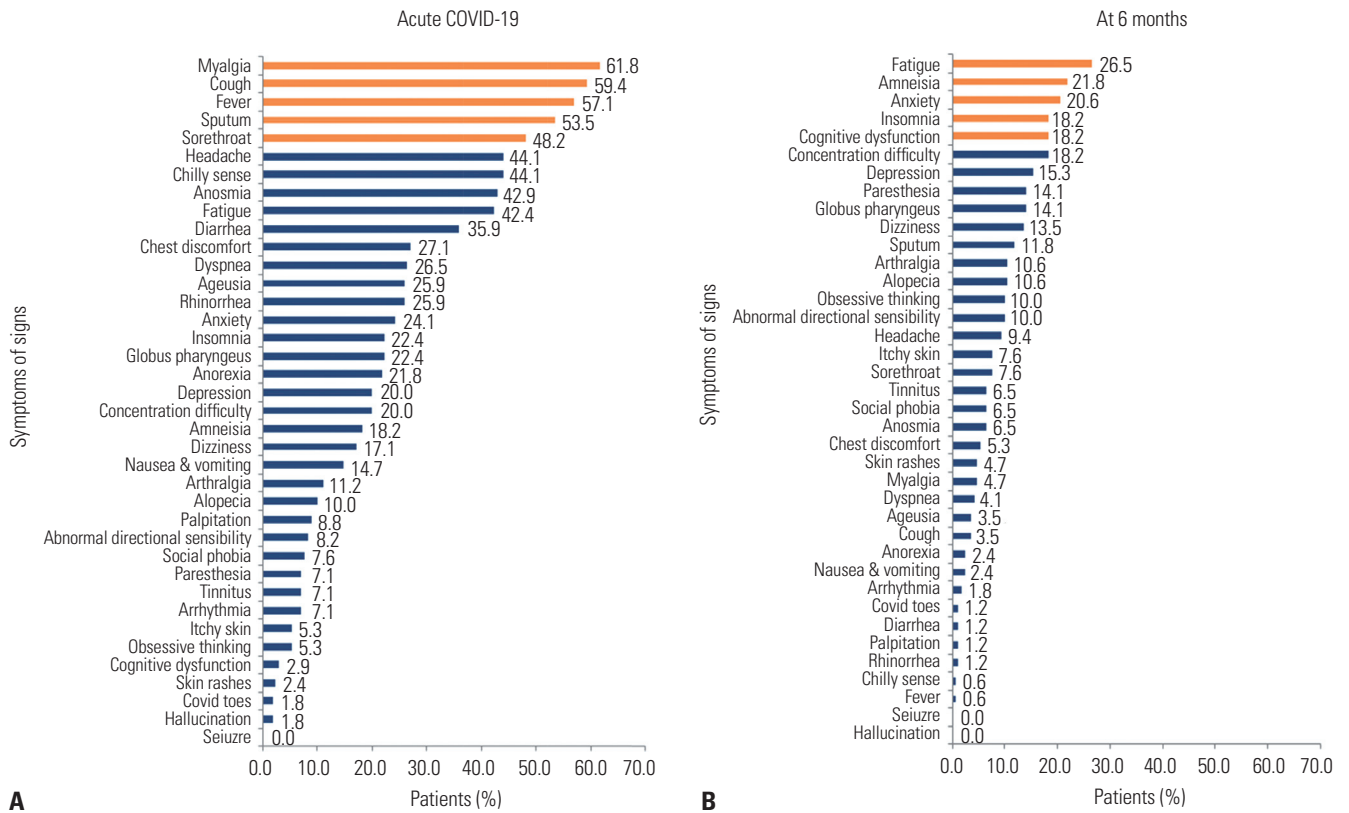

**A** **B**  
**Supplementary Fig. 1.** Distribution of symptoms or signs during acute COVID-19 (A) and after 6 months from acute COVID-19 infection (B). COVID-19, coronavirus disease.
