# Supplementary material for: One Year Follow-Up of COVID-19 Related Symptoms and Patient Quality of Life: A Prospective Cohort Study
Source: PubMed Central journal article supplement — Yonsei Med J. 2022 May 19;63(6):499–510. doi: 10.3349/ymj.2022.63.6.499 (PMC9171672; doi:10.3349/ymj.2022.63.6.499), 2022-05-19
Supplement: ymj-63-499-s002.pdf [file ymj-63-499-s002.pdf]

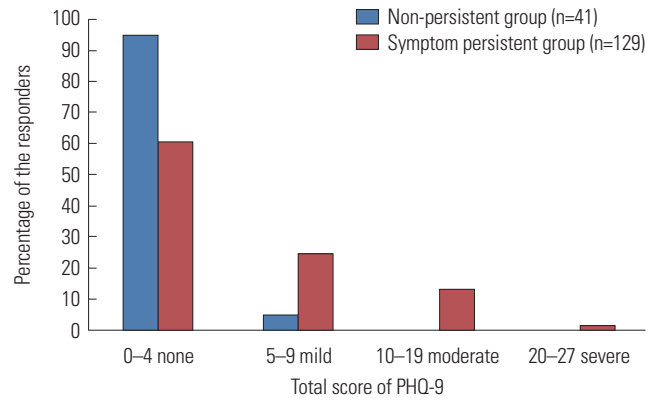

**Supplementary Fig. 2.** Distribution of total scores for PHQ-9 in the symptom persistent and non-persistent groups. PHQ-9, Korean version of the Patient Health Questionnaire-9 (depression screening for people at risk).
