# Supplementary material for: One Year Follow-Up of COVID-19 Related Symptoms and Patient Quality of Life: A Prospective Cohort Study
Source: PubMed Central journal article supplement — Yonsei Med J. 2022 May 19;63(6):499–510. doi: 10.3349/ymj.2022.63.6.499 (PMC9171672; doi:10.3349/ymj.2022.63.6.499), 2022-05-19
Supplement: ymj-63-499-s003.pdf [file ymj-63-499-s003.pdf]

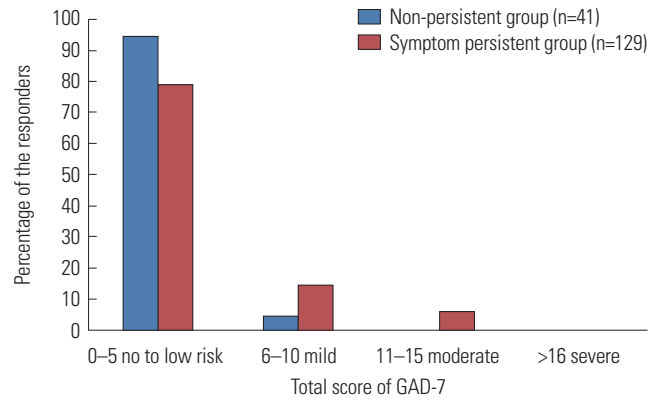

**Supplementary Fig. 3.** Distribution of total scores for GAD-7 in the symptom persistent and non-persistent groups. GAD-7, Generalized Anxiety Disorder-7.
