# Supplementary material for: One Year Follow-Up of COVID-19 Related Symptoms and Patient Quality of Life: A Prospective Cohort Study
Source: PubMed Central journal article supplement — Yonsei Med J. 2022 May 19;63(6):499–510. doi: 10.3349/ymj.2022.63.6.499 (PMC9171672; doi:10.3349/ymj.2022.63.6.499), 2022-05-19
Supplement: ymj-63-499-s005.pdf [file ymj-63-499-s005.pdf]

**Supplementary Table 1.** Assessment of Re-Admission, Vaccination, and Newly Diagnosed Diseases among the 170 Respondents at 12 Months after Recovering from Acute COVID-19 Infection

| Characteristics                                                                 | Symptom persistent group<br>(n=129) | Non-persistent group<br>(n=41) | Total<br>(n=170) | p value |
|---------------------------------------------------------------------------------|-------------------------------------|--------------------------------|------------------|---------|
| Vaccinated against influenza within last 6 months                               |                                     |                                |                  | 0.289   |
| Yes                                                                             | 45 (34.9)                           | 10 (24.4)                      | 55 (32.4)        |         |
| No                                                                              | 84 (65.1)                           | 31 (75.6)                      | 115 (67.6)       |         |
| Re-admitted to hospital or a health facility after first acute COVID-19 illness |                                     |                                |                  | 0.544   |
| Yes                                                                             | 0 (0.0)                             | 1 (2.4)                        | 1 (0.6)          |         |
| No                                                                              | 129 (100.0)                         | 40 (97.6)                      | 169 (99.4)       |         |
| Feel fully recovered from COVID-19                                              |                                     |                                |                  | <0.001  |
| Strongly disagree                                                               | 11 (8.5)                            | 0 (0.0)                        | 11 (6.5)         |         |
| Disagree                                                                        | 27 (20.9)                           | 1 (2.4)                        | 28 (16.5)        |         |
| Neither disagree nor agree                                                      | 32 (24.8)                           | 4 (9.8)                        | 36 (21.2)        |         |
| Agree                                                                           | 32 (24.8)                           | 11 (26.8)                      | 43 (25.3)        |         |
| Strongly agree                                                                  | 27 (20.9)                           | 25 (61.0)                      | 52 (30.6)        |         |
| Since having COVID-19, presence of newly diagnosed diseases                     |                                     |                                |                  | 0.061   |
| Yes                                                                             | 14 (10.9)                           | 0 (0.0)                        | 14 (8.2)         |         |
| No                                                                              | 115 (89.1)                          | 41 (100.0)                     | 156 (91.8)       |         |
| Since having COVID-19, newly diagnosed diseases                                 |                                     |                                |                  | 0.183   |
| Heart disease                                                                   | 1 (0.8)                             | 0 (0.0)                        | 1 (0.6)          |         |
| Stroke or mini stroke/TIA                                                       | 0 (0.0)                             | 0 (0.0)                        | 0 (0.0)          |         |
| Kidney problems                                                                 | 0 (0.0)                             | 0 (0.0)                        | 0 (0.0)          |         |
| Deep vein thrombosis (clot in leg)                                              | 2 (1.6)                             | 0 (0.0)                        | 2 (1.2)          |         |
| Pulmonary embolism (clot in lung)                                               | 0 (0.0)                             | 0 (0.0)                        | 0 (0.0)          |         |
| Other condition                                                                 | 11 (8.5)                            | 0 (0.0)                        | 11 (6.5)         |         |
| None                                                                            | 115 (89.1)                          | 41 (100.0)                     | 156 (91.8)       |         |
| COVID-19 vaccination history*                                                   |                                     |                                |                  | 0.848   |
| Yes                                                                             | 5 (9.4)                             | 1 (4.8)                        | 6 (8.1)          |         |
| No                                                                              | 48 (90.6)                           | 20 (95.2)                      | 68 (91.9)        |         |

COVID-19, coronavirus disease; TIA, transient ischemic attack.

Data are presented as n (%).

\*All vaccinated people had received AstraZeneca.
