# Supplementary material for: One Year Follow-Up of COVID-19 Related Symptoms and Patient Quality of Life: A Prospective Cohort Study
Source: PubMed Central journal article supplement — Yonsei Med J. 2022 May 19;63(6):499–510. doi: 10.3349/ymj.2022.63.6.499 (PMC9171672; doi:10.3349/ymj.2022.63.6.499), 2022-05-19
Supplement: ymj-63-499-s006.pdf [file ymj-63-499-s006.pdf]

**Supplementary Table 2.** Assessment of Difficulties in Doing Certain Activities among the 170 Respondents at 12 Months after Acute COVID-19 Infection

| Characteristics                                                                                                     | Symptom persistent group<br>(n=129) | Non-persistent group<br>(n=41) | Total<br>(n=170) | p value |
|---------------------------------------------------------------------------------------------------------------------|-------------------------------------|--------------------------------|------------------|---------|
| Difficulty of seeing even if wearing glasses                                                                        |                                     |                                |                  | 0.027   |
| No-no difficulty                                                                                                    | 90 (69.8)                           | 37 (90.2)                      | 127 (74.7)       |         |
| Yes-some difficulty                                                                                                 | 35 (27.1)                           | 3 (7.3)                        | 38 (22.4)        |         |
| Yes-a lot of difficulty                                                                                             | 4 (3.1)                             | 1 (2.4)                        | 5 (2.9)          |         |
| Cannot do at all                                                                                                    | 0 (0.0)                             | 0 (0.0)                        | 0 (0.0)          |         |
| Difficulty in hearing, even if using a hearing aid                                                                  |                                     |                                |                  | 0.178   |
| No-no difficulty                                                                                                    | 113 (87.6)                          | 40 (97.6)                      | 153 (90.0)       |         |
| Yes-some difficulty                                                                                                 | 15 (11.6)                           | 1 (2.4)                        | 16 (9.4)         |         |
| Yes-a lot of difficulty                                                                                             | 1 (0.8)                             | 0 (0.0)                        | 1 (0.6)          |         |
| Cannot do at all                                                                                                    | 0 (0.0)                             | 0 (0.0)                        | 0 (0.0)          |         |
| Difficulty in walking or climbing steps                                                                             |                                     |                                |                  | 0.031   |
| No-no difficulty                                                                                                    | 97 (75.2)                           | 38 (92.7)                      | 135 (79.4)       |         |
| Yes-some difficulty                                                                                                 | 30 (23.3)                           | 2 (4.9)                        | 32 (18.8)        |         |
| Yes-a lot of difficulty                                                                                             | 2 (1.6)                             | 1 (2.4)                        | 3 (1.8)          |         |
| Cannot do at all                                                                                                    | 0 (0.0)                             | 0 (0.0)                        | 0 (0.0)          |         |
| Difficulty in remembering or concentrating                                                                          |                                     |                                |                  | <0.001  |
| No-no difficulty                                                                                                    | 65 (50.4)                           | 35 (85.4)                      | 100 (58.8)       |         |
| Yes-some difficulty                                                                                                 | 60 (46.5)                           | 6 (14.6)                       | 66 (38.8)        |         |
| Yes-a lot of difficulty                                                                                             | 4 (3.1)                             | 0 (0.0)                        | 4 (2.4)          |         |
| Cannot do at all                                                                                                    | 0 (0.0)                             | 0 (0.0)                        | 0 (0.0)          |         |
| Difficulty (with self-care such as) washing all over or dressing                                                    |                                     |                                |                  | >0.999  |
| No-no difficulty                                                                                                    | 122 (94.6)                          | 39 (95.1)                      | 161 (94.7)       |         |
| Yes-some difficulty                                                                                                 | 7 (5.4)                             | 2 (4.9)                        | 9 (5.3)          |         |
| Yes-a lot of difficulty                                                                                             | 0 (0.0)                             | 0 (0.0)                        | 0 (0.0)          |         |
| Cannot do at all                                                                                                    | 0 (0.0)                             | 0 (0.0)                        | 0 (0.0)          |         |
| Using usual (customary) language, having difficulty in communicating, for example understanding or being understood |                                     |                                |                  | 0.148   |
| No-no difficulty                                                                                                    | 114 (88.4)                          | 40 (97.6)                      | 154 (90.6)       |         |
| Yes-some difficulty                                                                                                 | 15 (11.6)                           | 1 (2.4)                        | 16 (9.4)         |         |
| Yes-a lot of difficulty                                                                                             | 0 (0.0)                             | 0 (0.0)                        | 0 (0.0)          |         |
| Cannot do at all                                                                                                    | 0 (0.0)                             | 0 (0.0)                        | 0 (0.0)          |         |

COVID-19, coronavirus disease.

Data are presented as n (%).
